# Supplementary material for: USP22 upregulates ZEB1-mediated VEGFA transcription in hepatocellular carcinoma
Source: PubMed Central journal article supplement (PMC10008583; doi:10.1038/s41419-023-05699-y), 2023-03-11

# Supplementary Figure 1

**A**

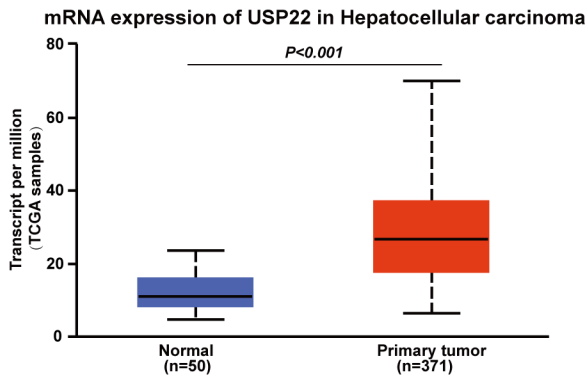

**B**

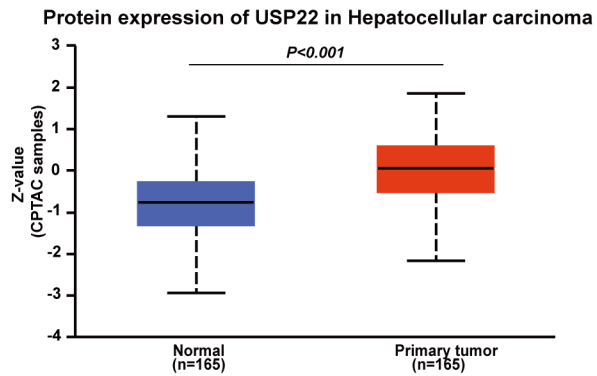

**C**

Expression of USP22 in HCC based on individual cancer stages

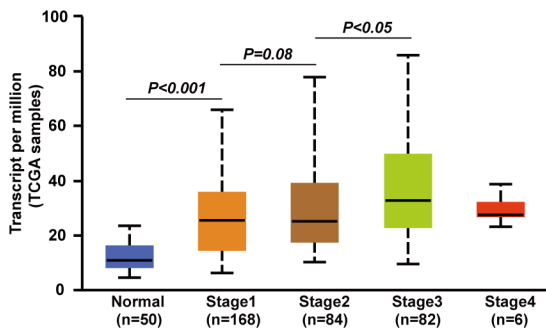

**D**

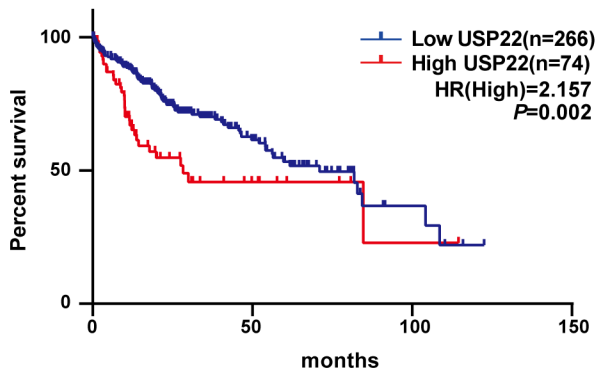

# Supplementary Figure 2

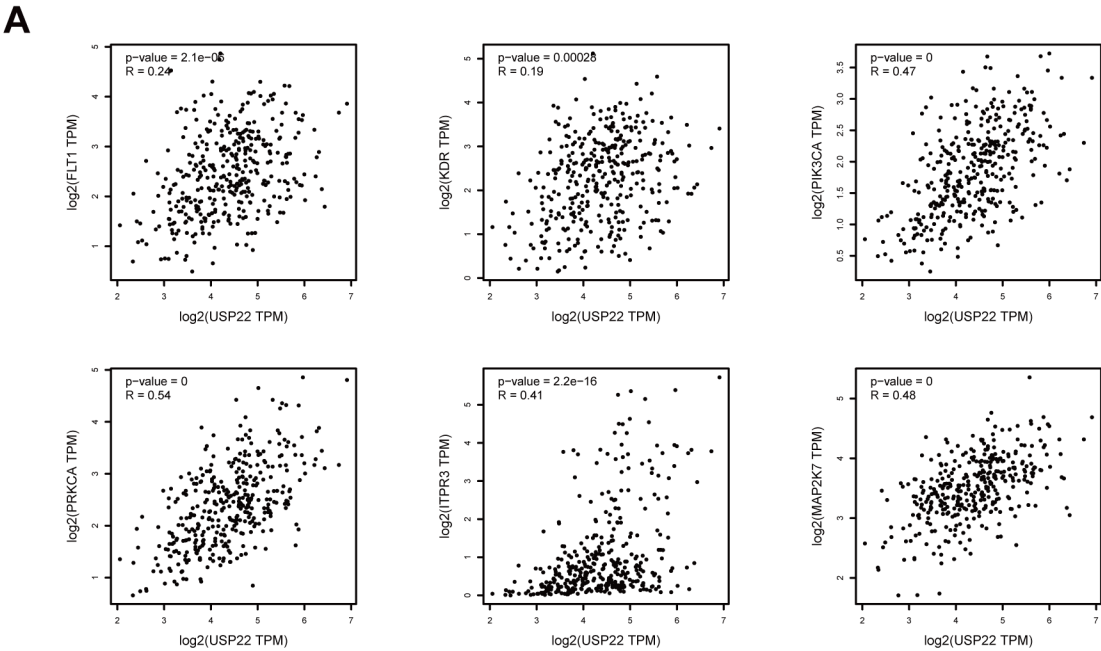

**B**  
Huh7

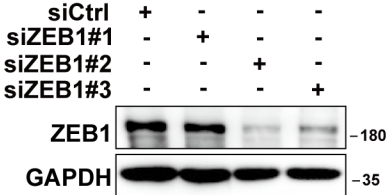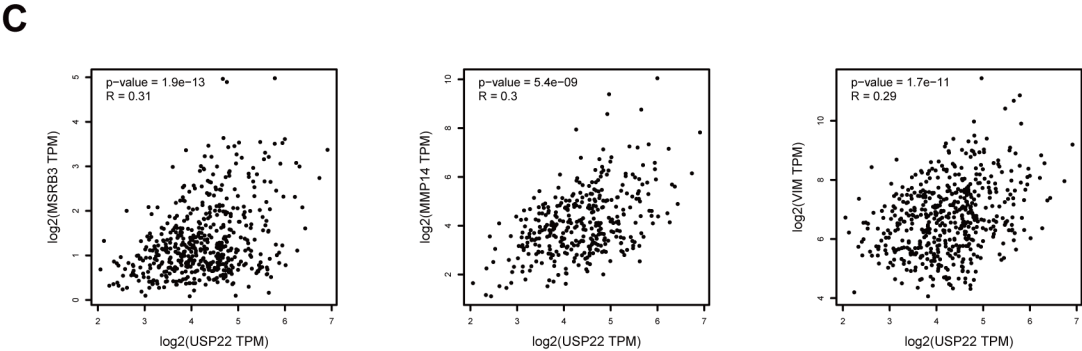

# Supplementary Figure 3

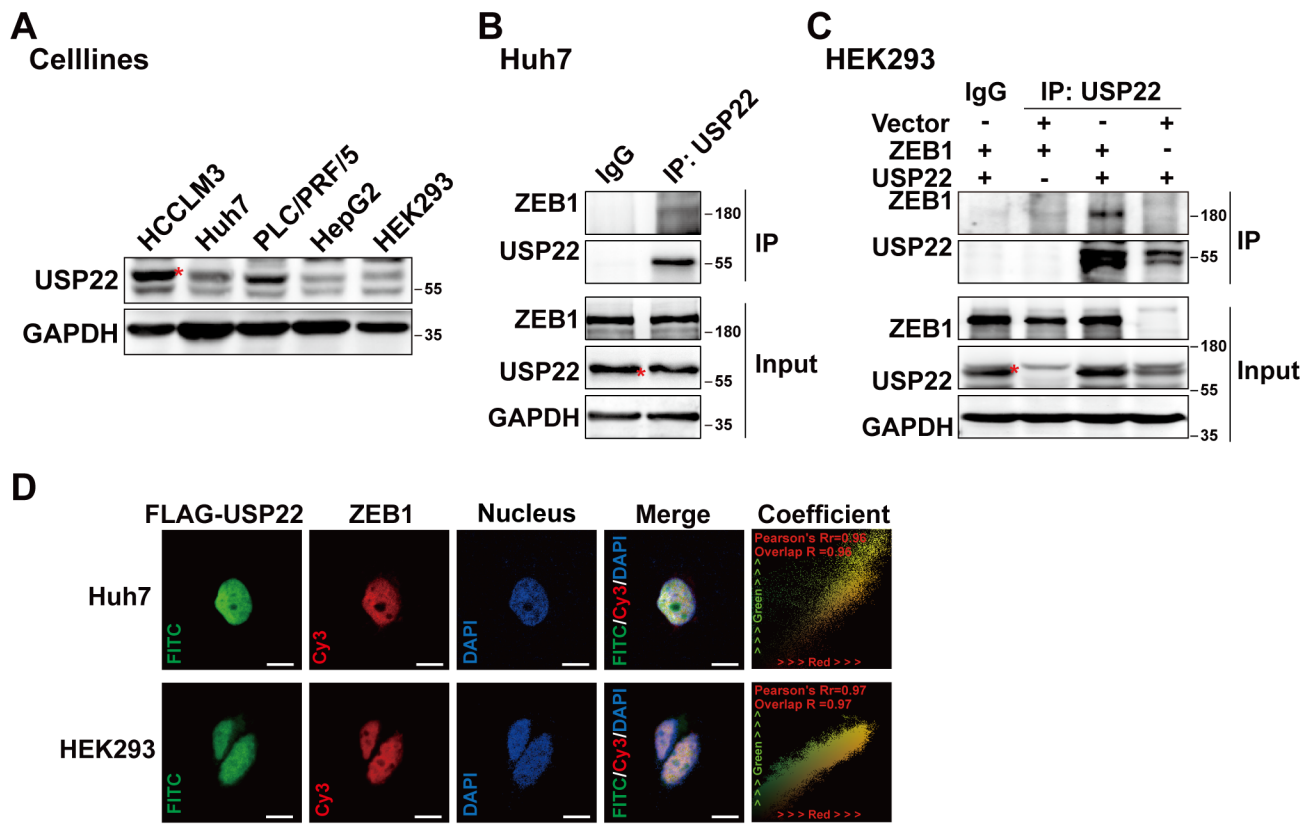

# Supplementary Figure 4

**A**

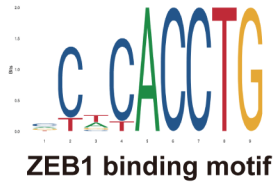

**B**

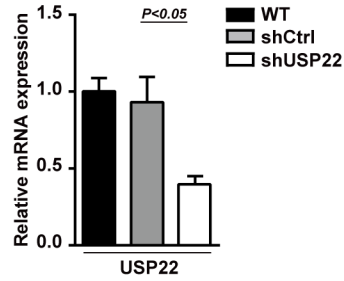

**C**

HCCLM3

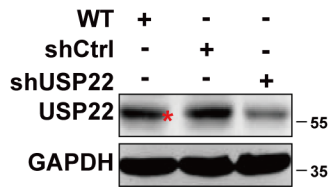

**D**

HCCLM3

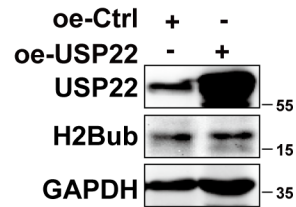

**E**

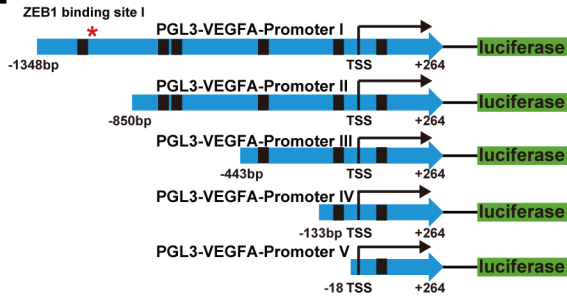

**F**

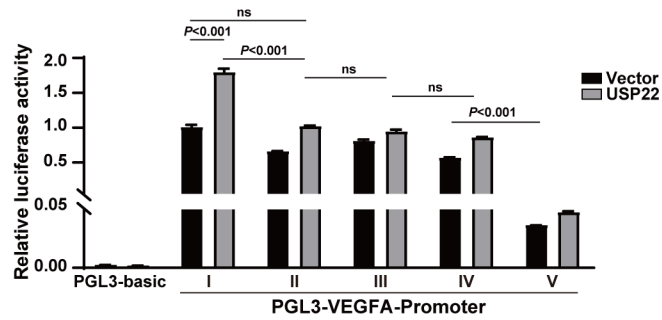

# Supplementary Figure 5

## A

Huh7

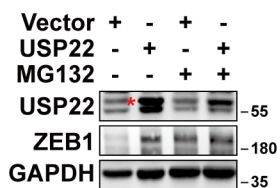

## B

HCCLM3

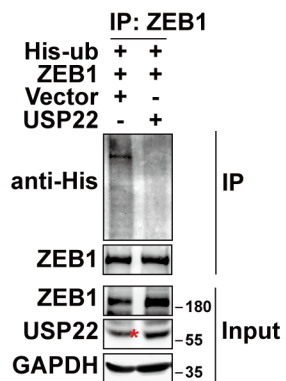

# Supplementary Figure 6

**A**

Huh7 cells

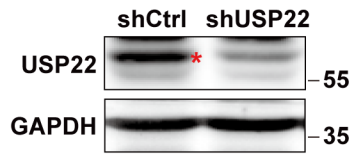

**B**

PLC/PRF/5 cells

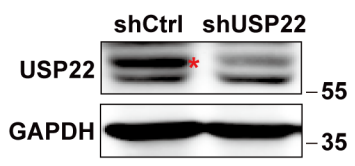

**C**

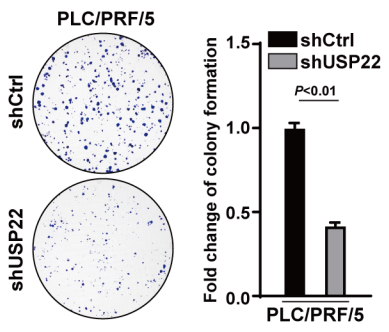

**D**

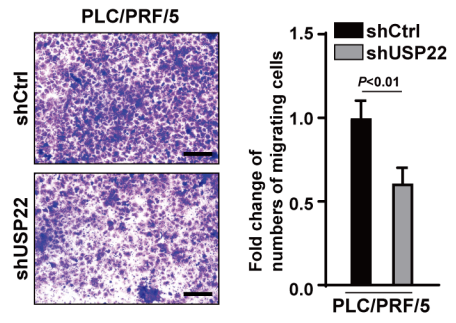

# Supplementary Figure 7

**A**

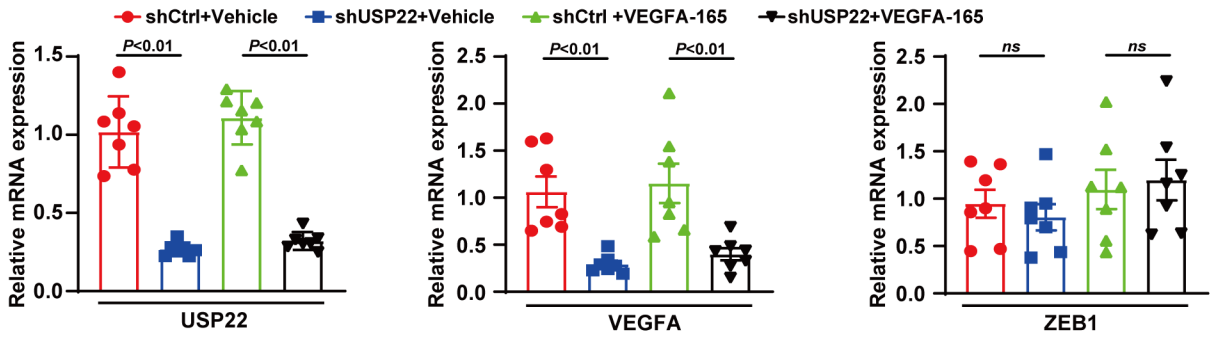

**B**

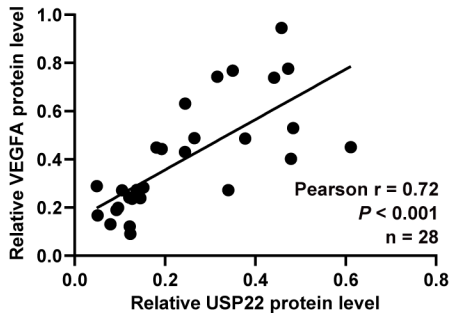

**C**

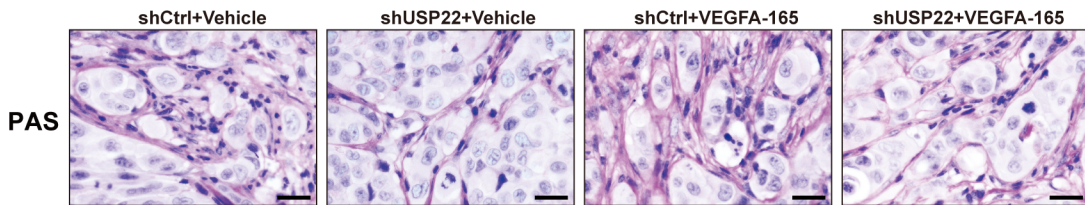

**D**

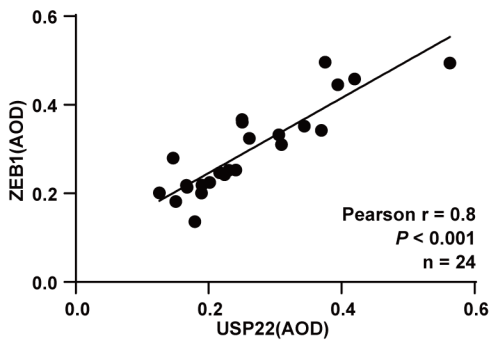

# Supplementary Figure 8

**A**

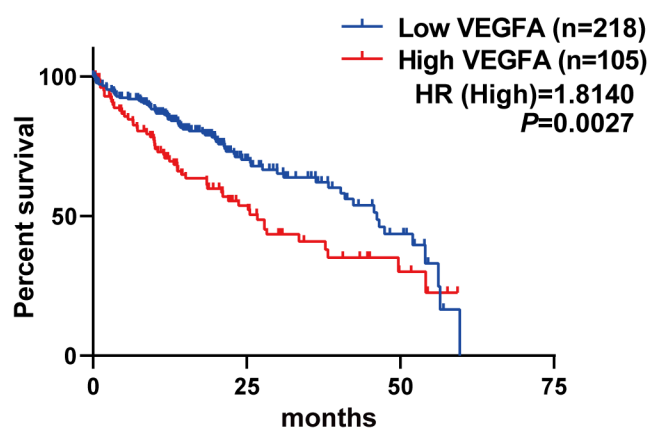

**B**

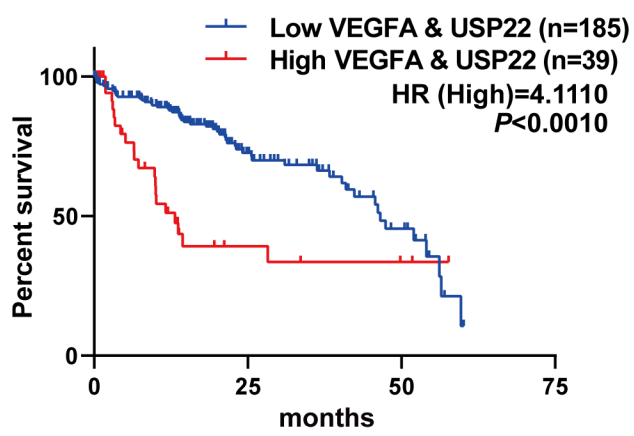

**C**

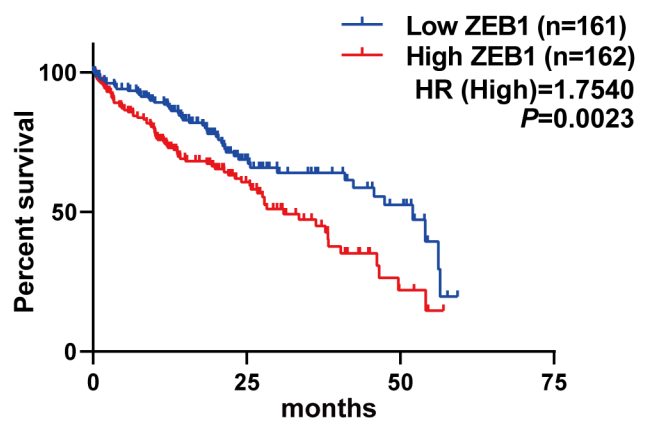

**D**

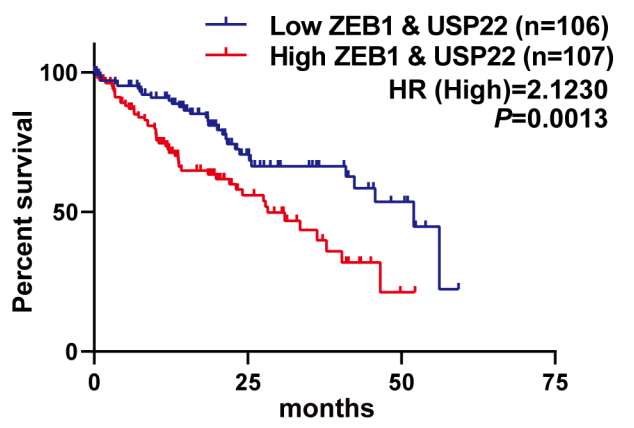

Supplement: 41419_2023_5699_MOESM3_ESM.pdf [file 41419_2023_5699_MOESM3_ESM.pdf]
