# Supplementary material for: USP22 upregulates ZEB1-mediated VEGFA transcription in hepatocellular carcinoma
Source: PubMed Central journal article supplement (PMC10008583; doi:10.1038/s41419-023-05699-y), 2023-03-11

# Original western blots merged with molecular weight markers

Fig 1C

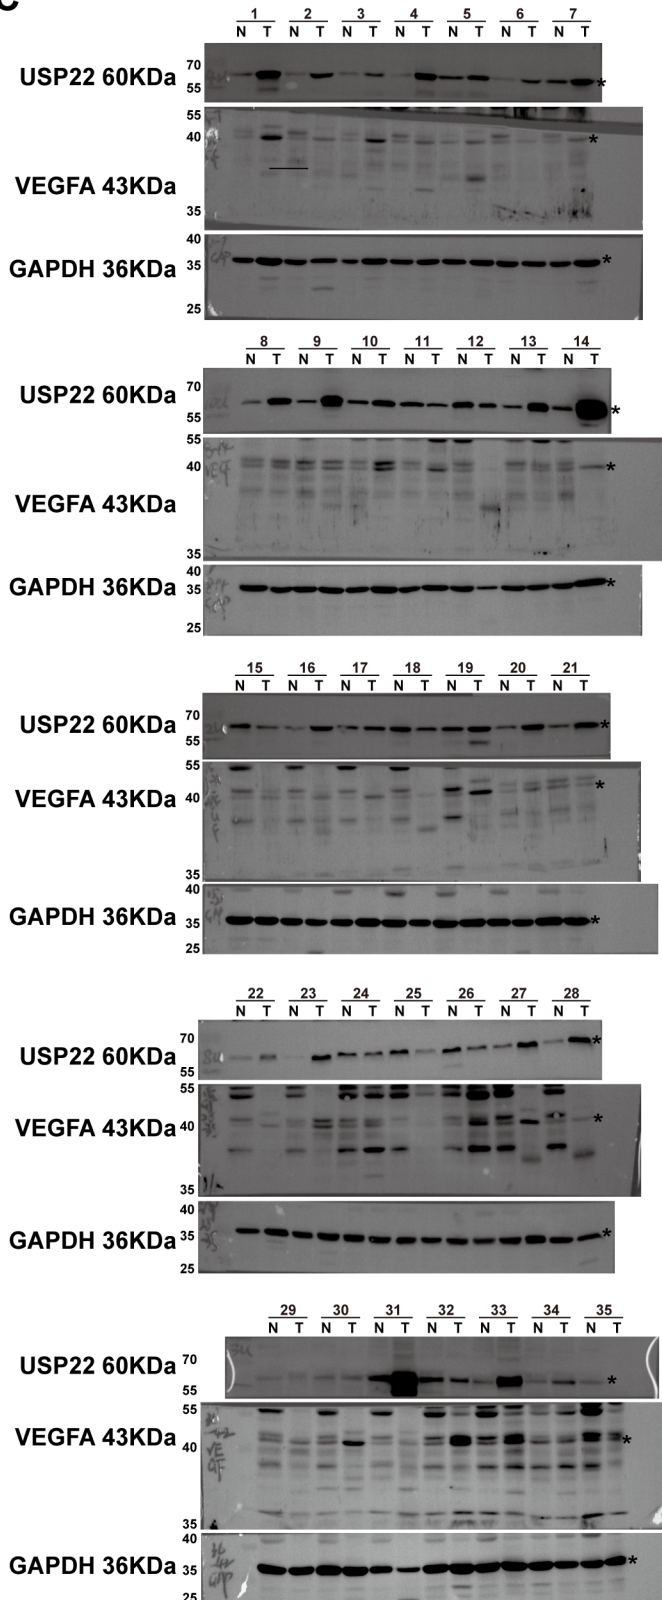

**Fig 2A**

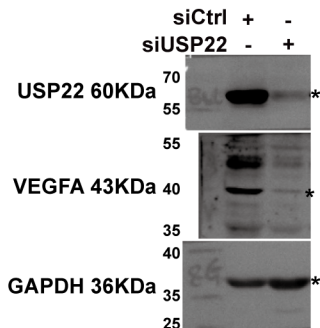

**Fig 2B**

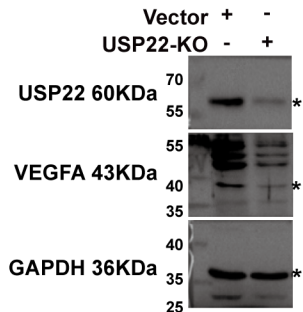

**Fig 2C**

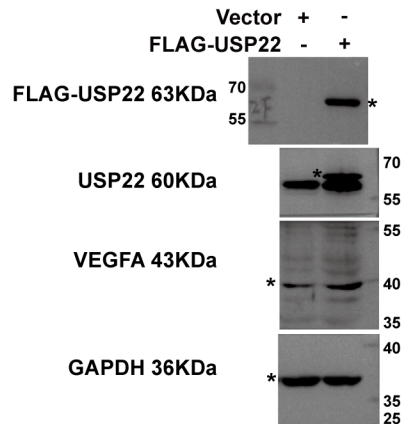

**Fig 2I**

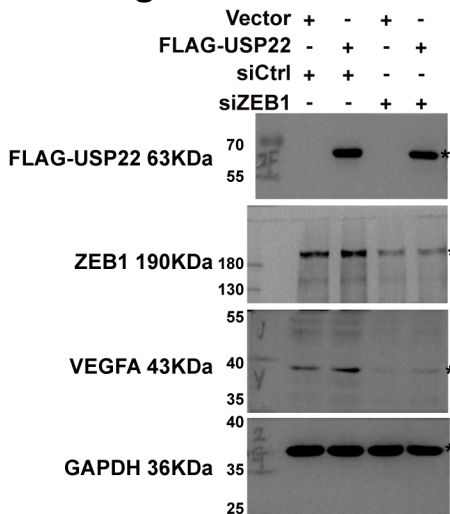

**Fig 3A**

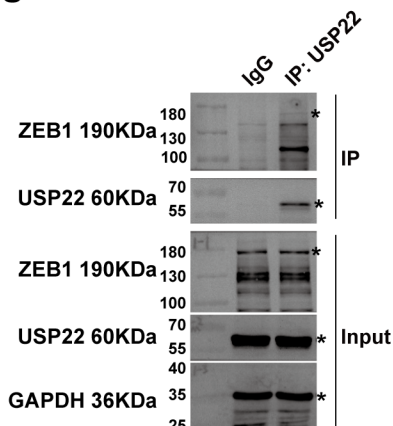

**Fig 3C**

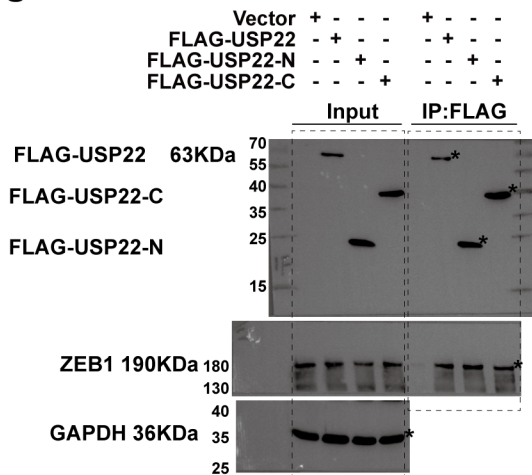

**Fig 3D**

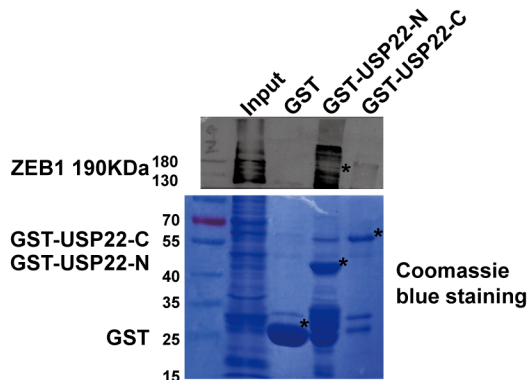

**Fig 4A**

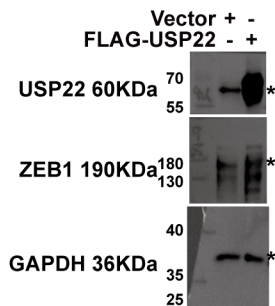

**Fig 4B**

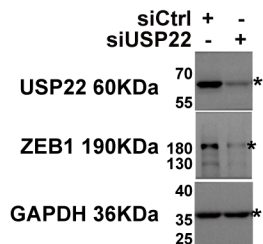

**Fig 4D**

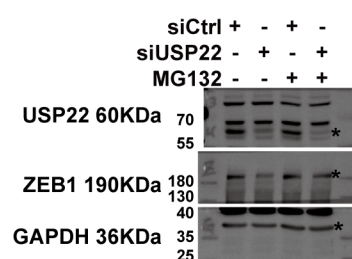

**Fig 4E**

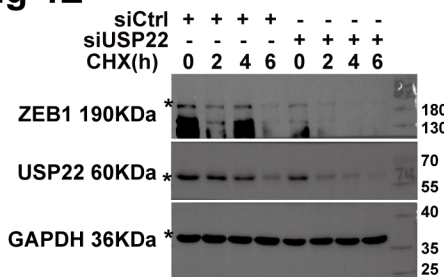

**Fig 4G**

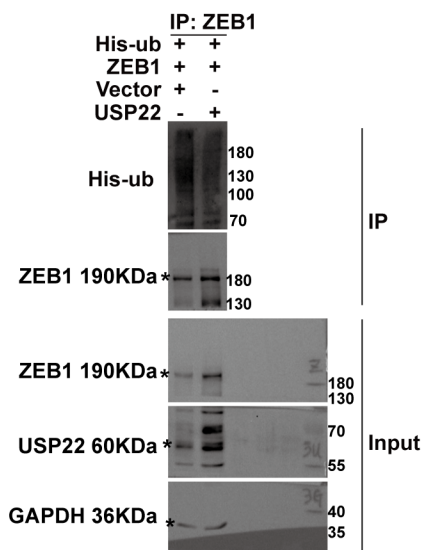

**Fig 4H**

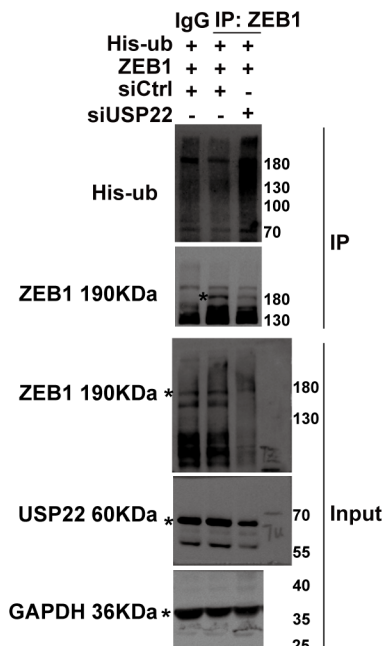

**Fig 4I**

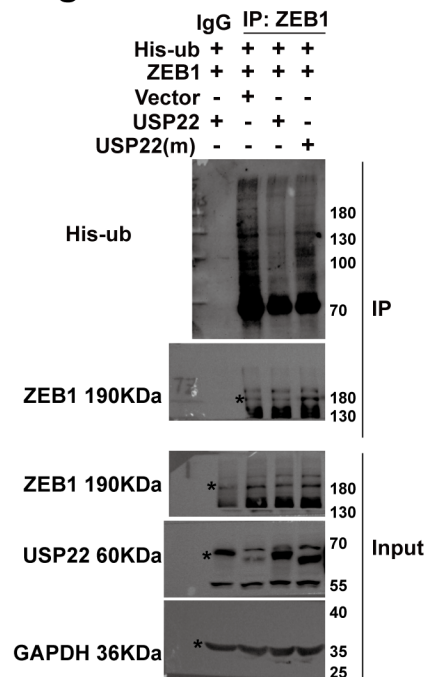

### Fig 4J

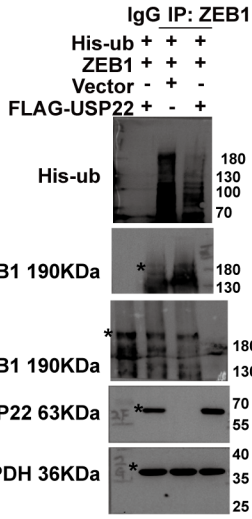

### Fig 4K

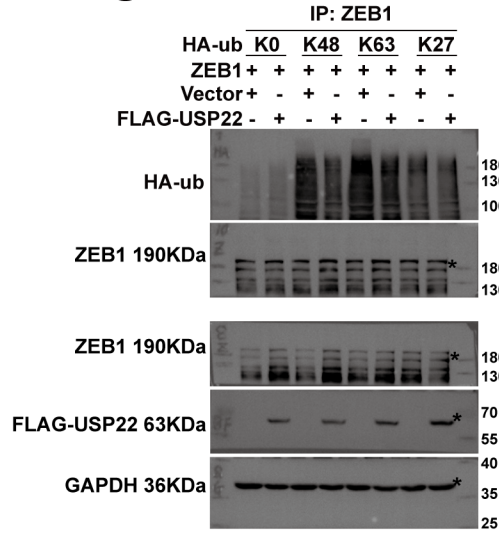

### Fig 4L

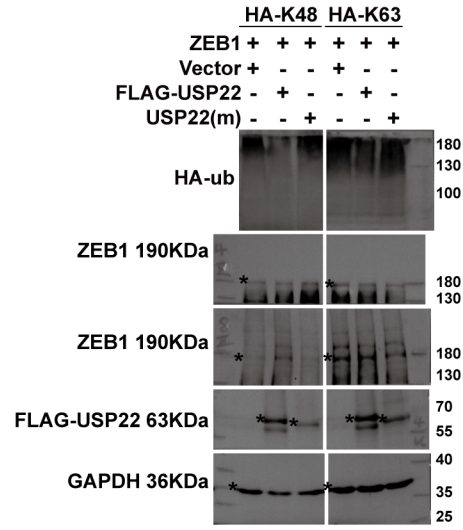

### Fig 6E

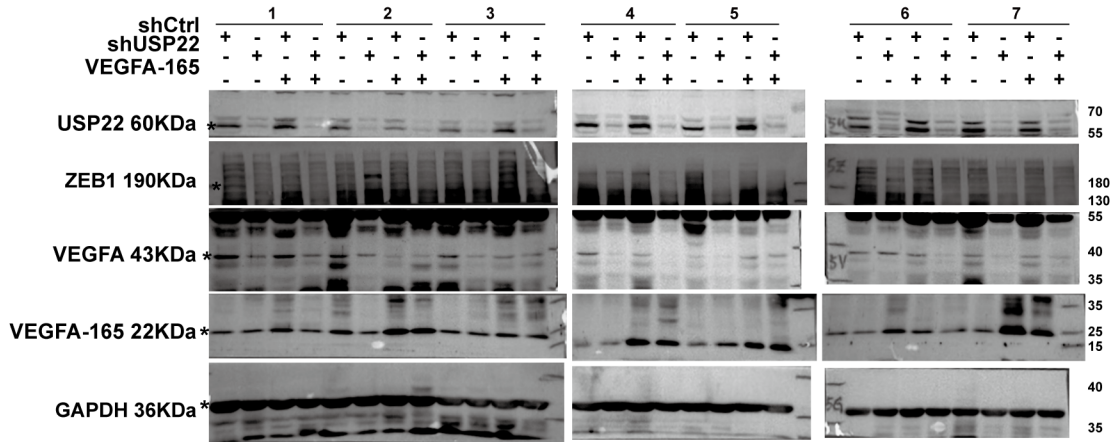

### Fig 6J

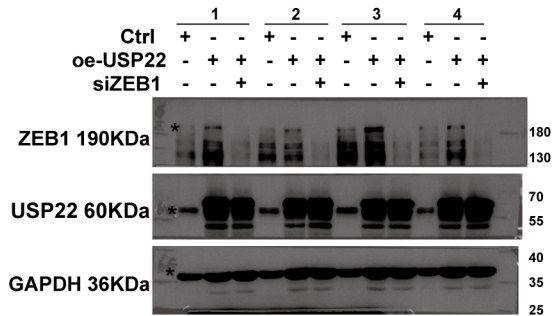

### Fig S2B

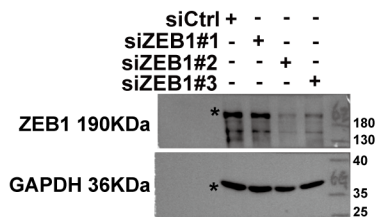

### Fig S3A

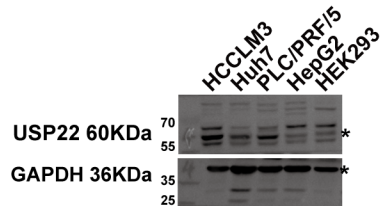

### Fig S3B

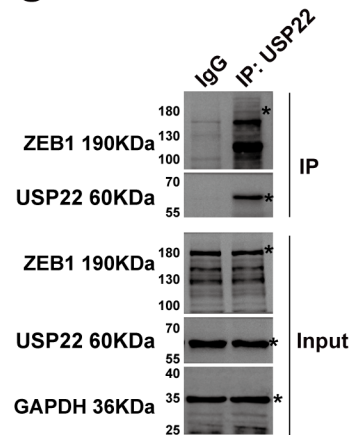

### Fig S3C

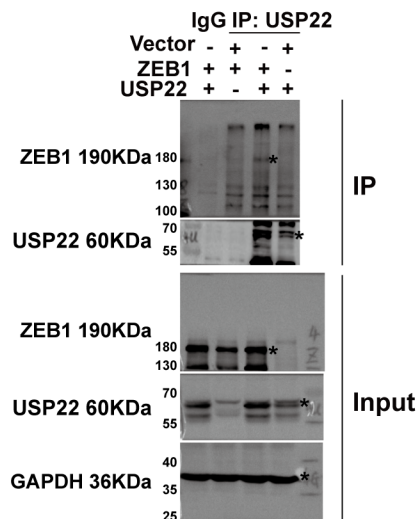

### Fig S4C

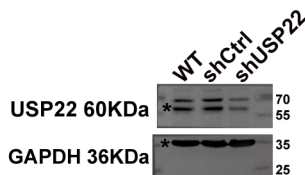

### Fig S4D

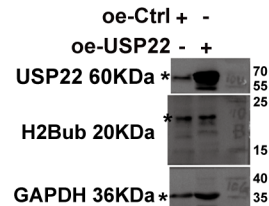

### Fig S5A

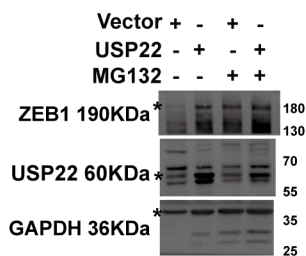

### Fig S5B

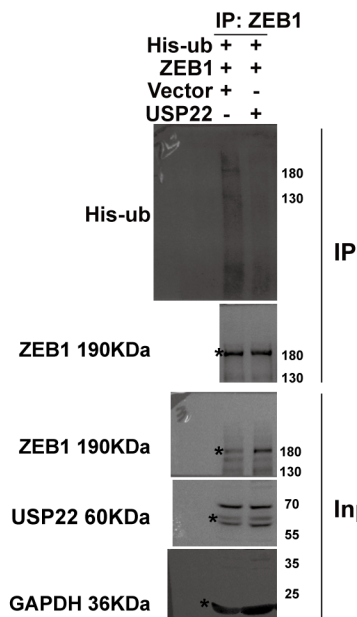

### Fig S6A

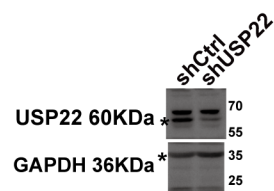

### Fig S6B

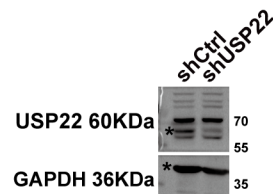

Supplement: 41419_2023_5699_MOESM6_ESM.pdf [file 41419_2023_5699_MOESM6_ESM.pdf]
