# Supplementary material for: USP22 upregulates ZEB1-mediated VEGFA transcription in hepatocellular carcinoma
Source: PubMed Central journal article supplement (PMC10008583; doi:10.1038/s41419-023-05699-y), 2023-03-11
Supplement: 41419_2023_5699_MOESM1_ESM.pdf [file 41419_2023_5699_MOESM1_ESM.pdf]

# DECLARATION OF CONTRIBUTIONS TO ARTICLE

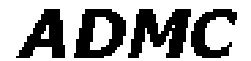

Manuscript Number:

**CDDIS-22-3830-T**

Journal Name:

*Cell Death & Disease*

(the 'Journal')

Proposed Title of the Contribution:

USP22 upregulates ZEB1-mediated VEGFA transcription in hepatocellular carcinoma

(the 'Contribution')

Author(s):

Kai Zeng, Weiwen Xie, Chunyu Wang, Shengli Wang, Wei Liu, Yingjie Su, Lin Lin, Renlong Zou, Ge Sun, Baosheng Zhou, Manlin Wang, Ruina Luan, Yu Bai, Yunlong Huo, Shigeaki Kato, Xinping Zhong, Yue Zhao

(the 'Authors')

For all *CDD* articles, each person named as an author in the published version must be able to show he or she has contributed substantially to the article.

Authorship credit should be based on 1) substantial contributions to conception and design, acquisition of data, or analysis and interpretation of data; 2) drafting the article or revising it critically for important intellectual content; and 3) final approval of the version to be published. Authors should meet conditions 1, 2 and 3.

Any person who cannot be shown to have made a substantial contribution to the article cannot be listed as an author in the final version. The name of any person who is deemed to have made a minor contribution can, however, appear in the Acknowledgments section of the article.

Please complete the table below to indicate the contributions of all named authors to the manuscript.

| Author Full Name: | Specification of Contribution to the Manuscript:                               |
|-------------------|--------------------------------------------------------------------------------|
| Yue Zhao          | conception and design the project, drafting the article                        |
| Kai Zeng          | drafting the article, acquisition of data, analysis and interpretation of data |
| Weiwen Xie        | drafting the article, acquisition of data, analysis and interpretation of data |
| Chunyu Wang       | acquisition of data and drafting the article                                   |
| Shengli Wang      | drafting the article                                                           |
| Wei Liu           | acquisition of data                                                            |
| Yingjie Su        | acquisition of data                                                            |
| Lin Lin           | acquisition of data                                                            |
| Renlong Zou       | acquisition of data                                                            |
| Ge Sun            | acquisition of data                                                            |
| Baosheng Zhou     | acquisition of data                                                            |
| Manlin Wang       | acquisition of data                                                            |
| Ruina Luan        | acquisition of data                                                            |

Author Full Name:

Specification of Contribution to the Manuscript:

Yu Bai

acquisition of data

Yunlong Huo

acquisition of data

Shigeaki Kato

revised it critically for important intellectual content and final approval of the version to be published

Xinping Zhong

revised it critically for important intellectual content

Please complete the table below to indicate the contributions of all named authors to the figures.

Figure 1:

Kai Zeng, Weiwen Xie

Figure 2:

Kai Zeng, Weiwen Xie

Figure 3:

Kai Zeng, Weiwen Xie

Figure 4:

Kai Zeng

Figure 5:

Kai Zeng, Weiwen Xie, Ge Sun, Manlin Wang, Ruina Luan, Yu Bai

Figure 6:

Kai Zeng, Wei Liu, Yingjie Su, Baosheng Zhou

Figure 7:

Kai Zeng, Chunyu Wang, Lin Lin, Renlong Zou

Figure 8:

Kai Zeng

Signed for and on behalf of the Author(s):

*Yue Zhao*

Print Name:

Yue Zhao

Date:

February 17, 2023
